# Supplementary material for: EURO-CORDEX: new high-resolution climate change projections for European impact research
Source: Springer Nature journal article supplement (doi:10.1007/s10113-013-0499-2), 2013-07-22
Supplement: MOESM4 [file 10113_2013_499_MOESM4_ESM.doc]

Seasonal mean temperature and precipitation climate change signals


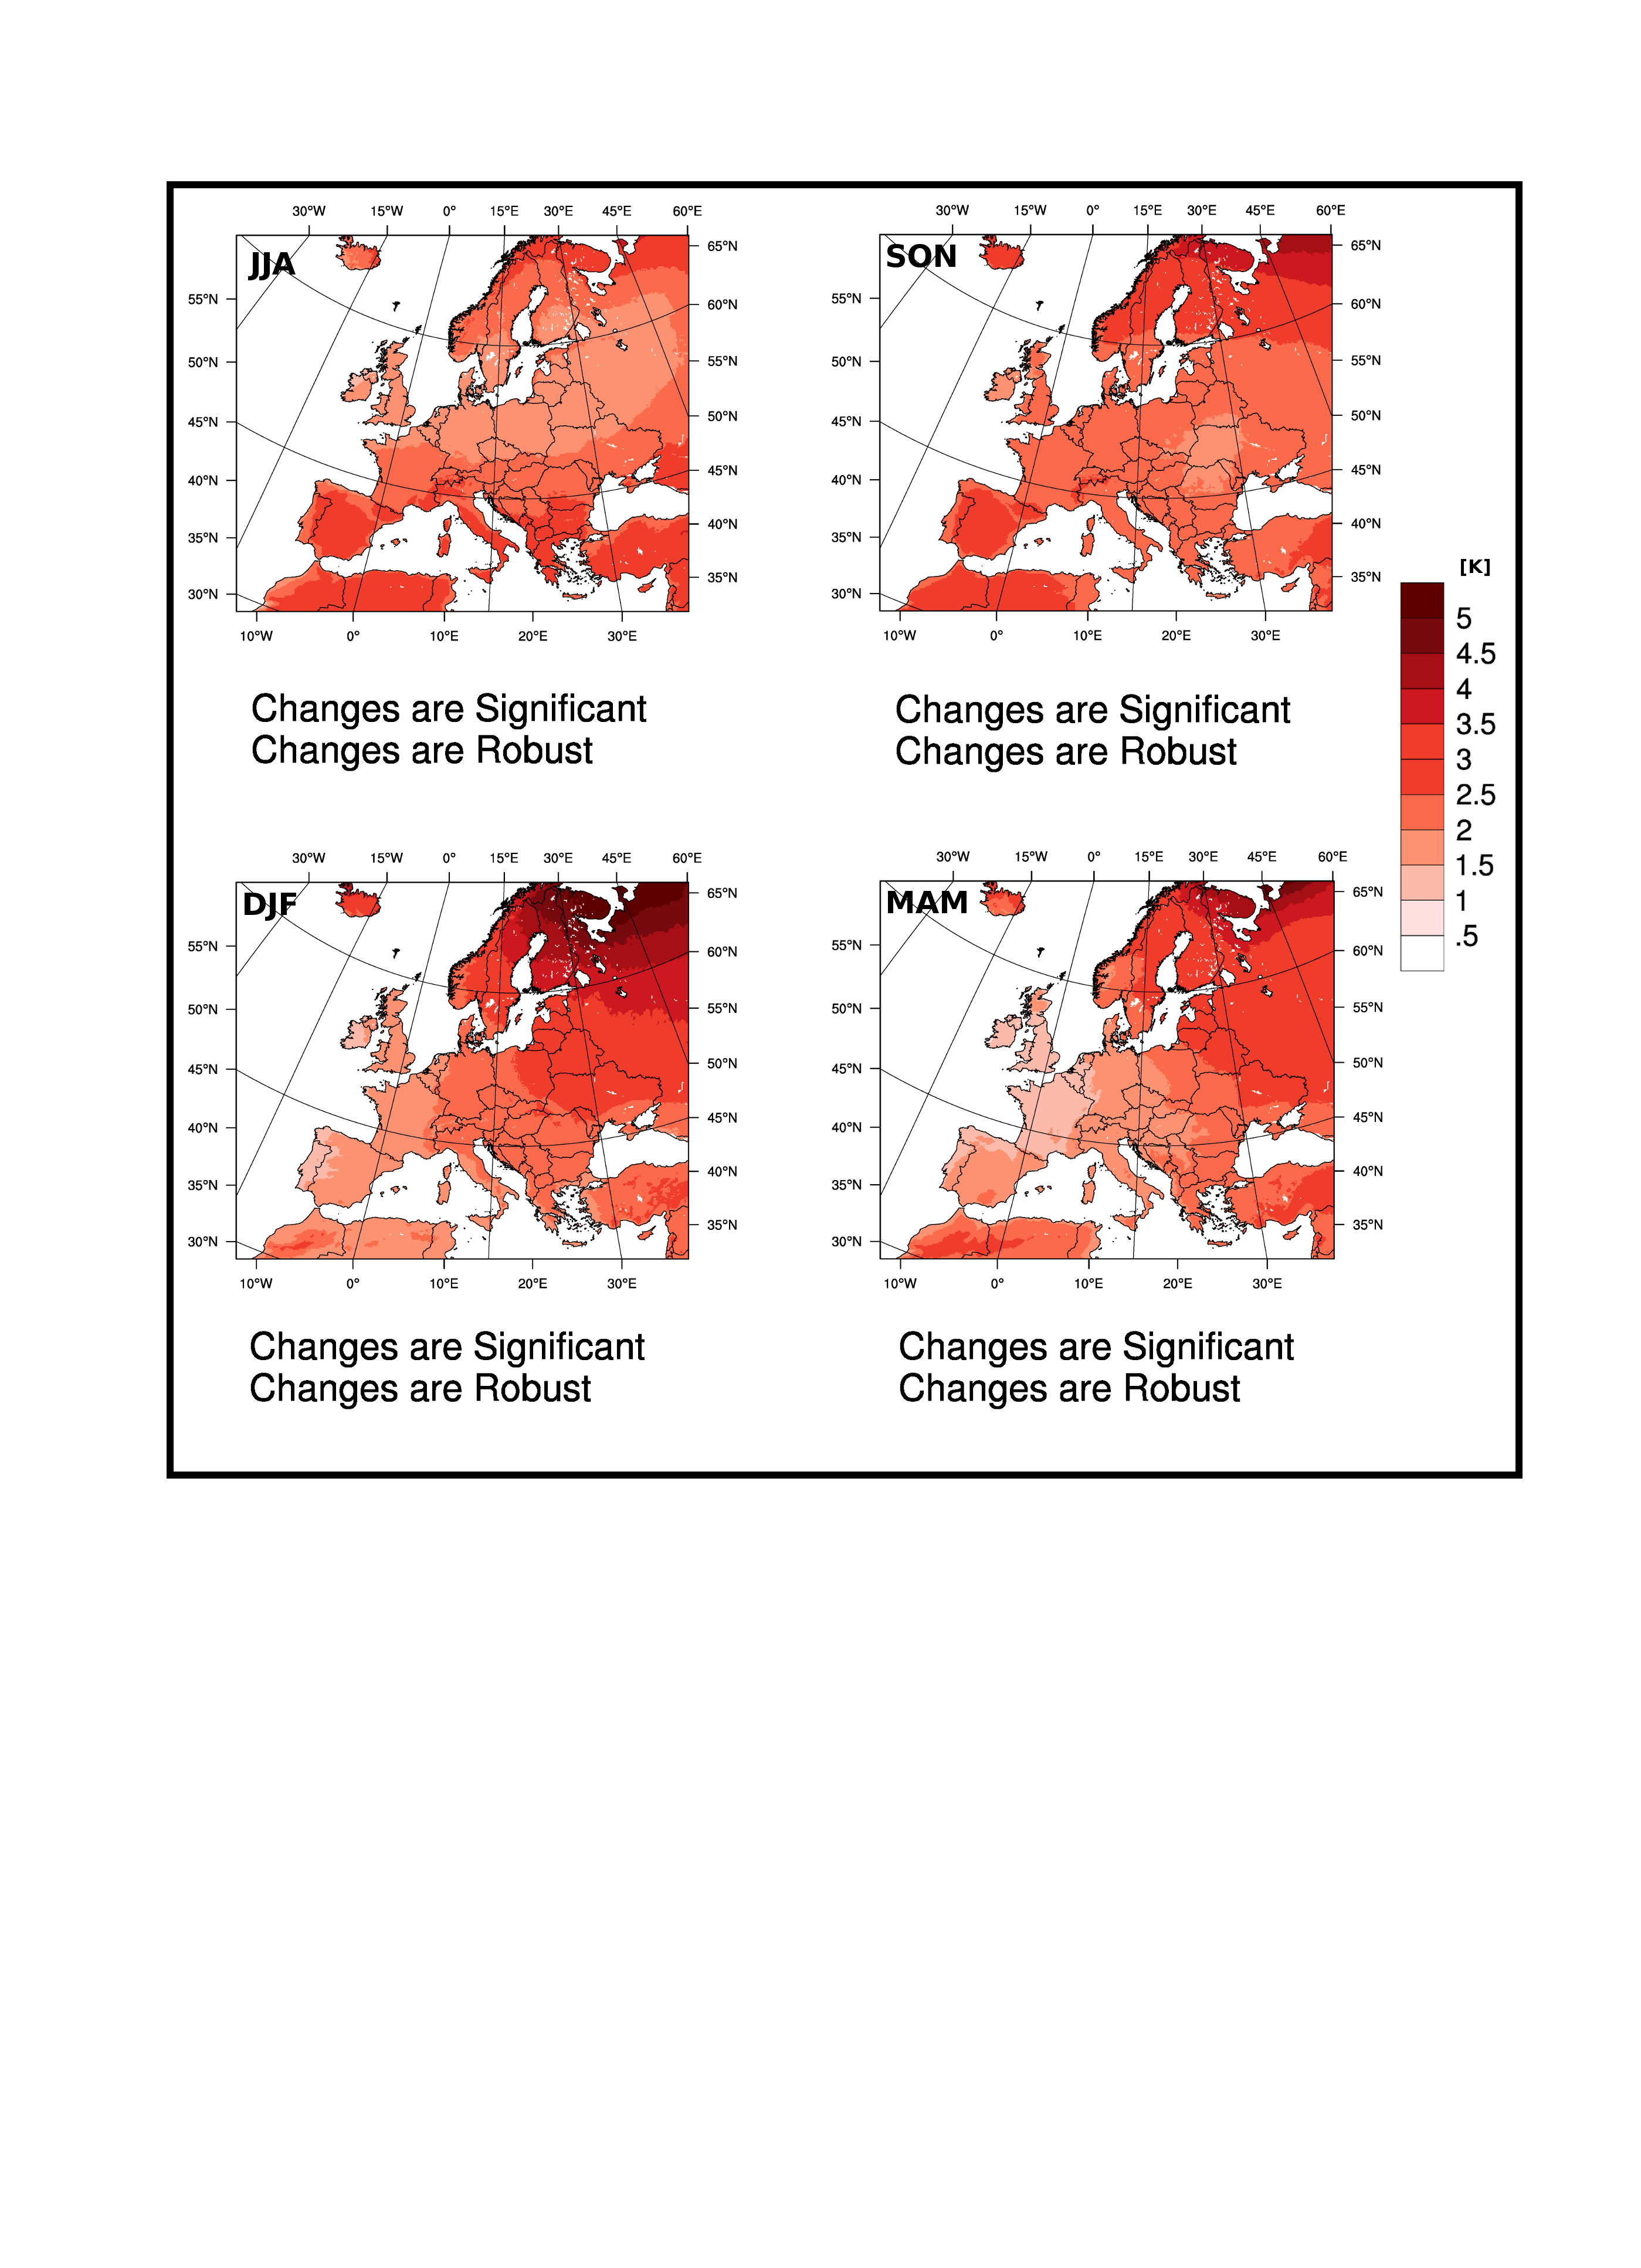


**Figure s2:** Projected seasonal changes of temperature [K] based on the RCP4.5 scenario for the period 2071-2100 compared to 1971-2000. Changes are robust and significant across the entire European continent.


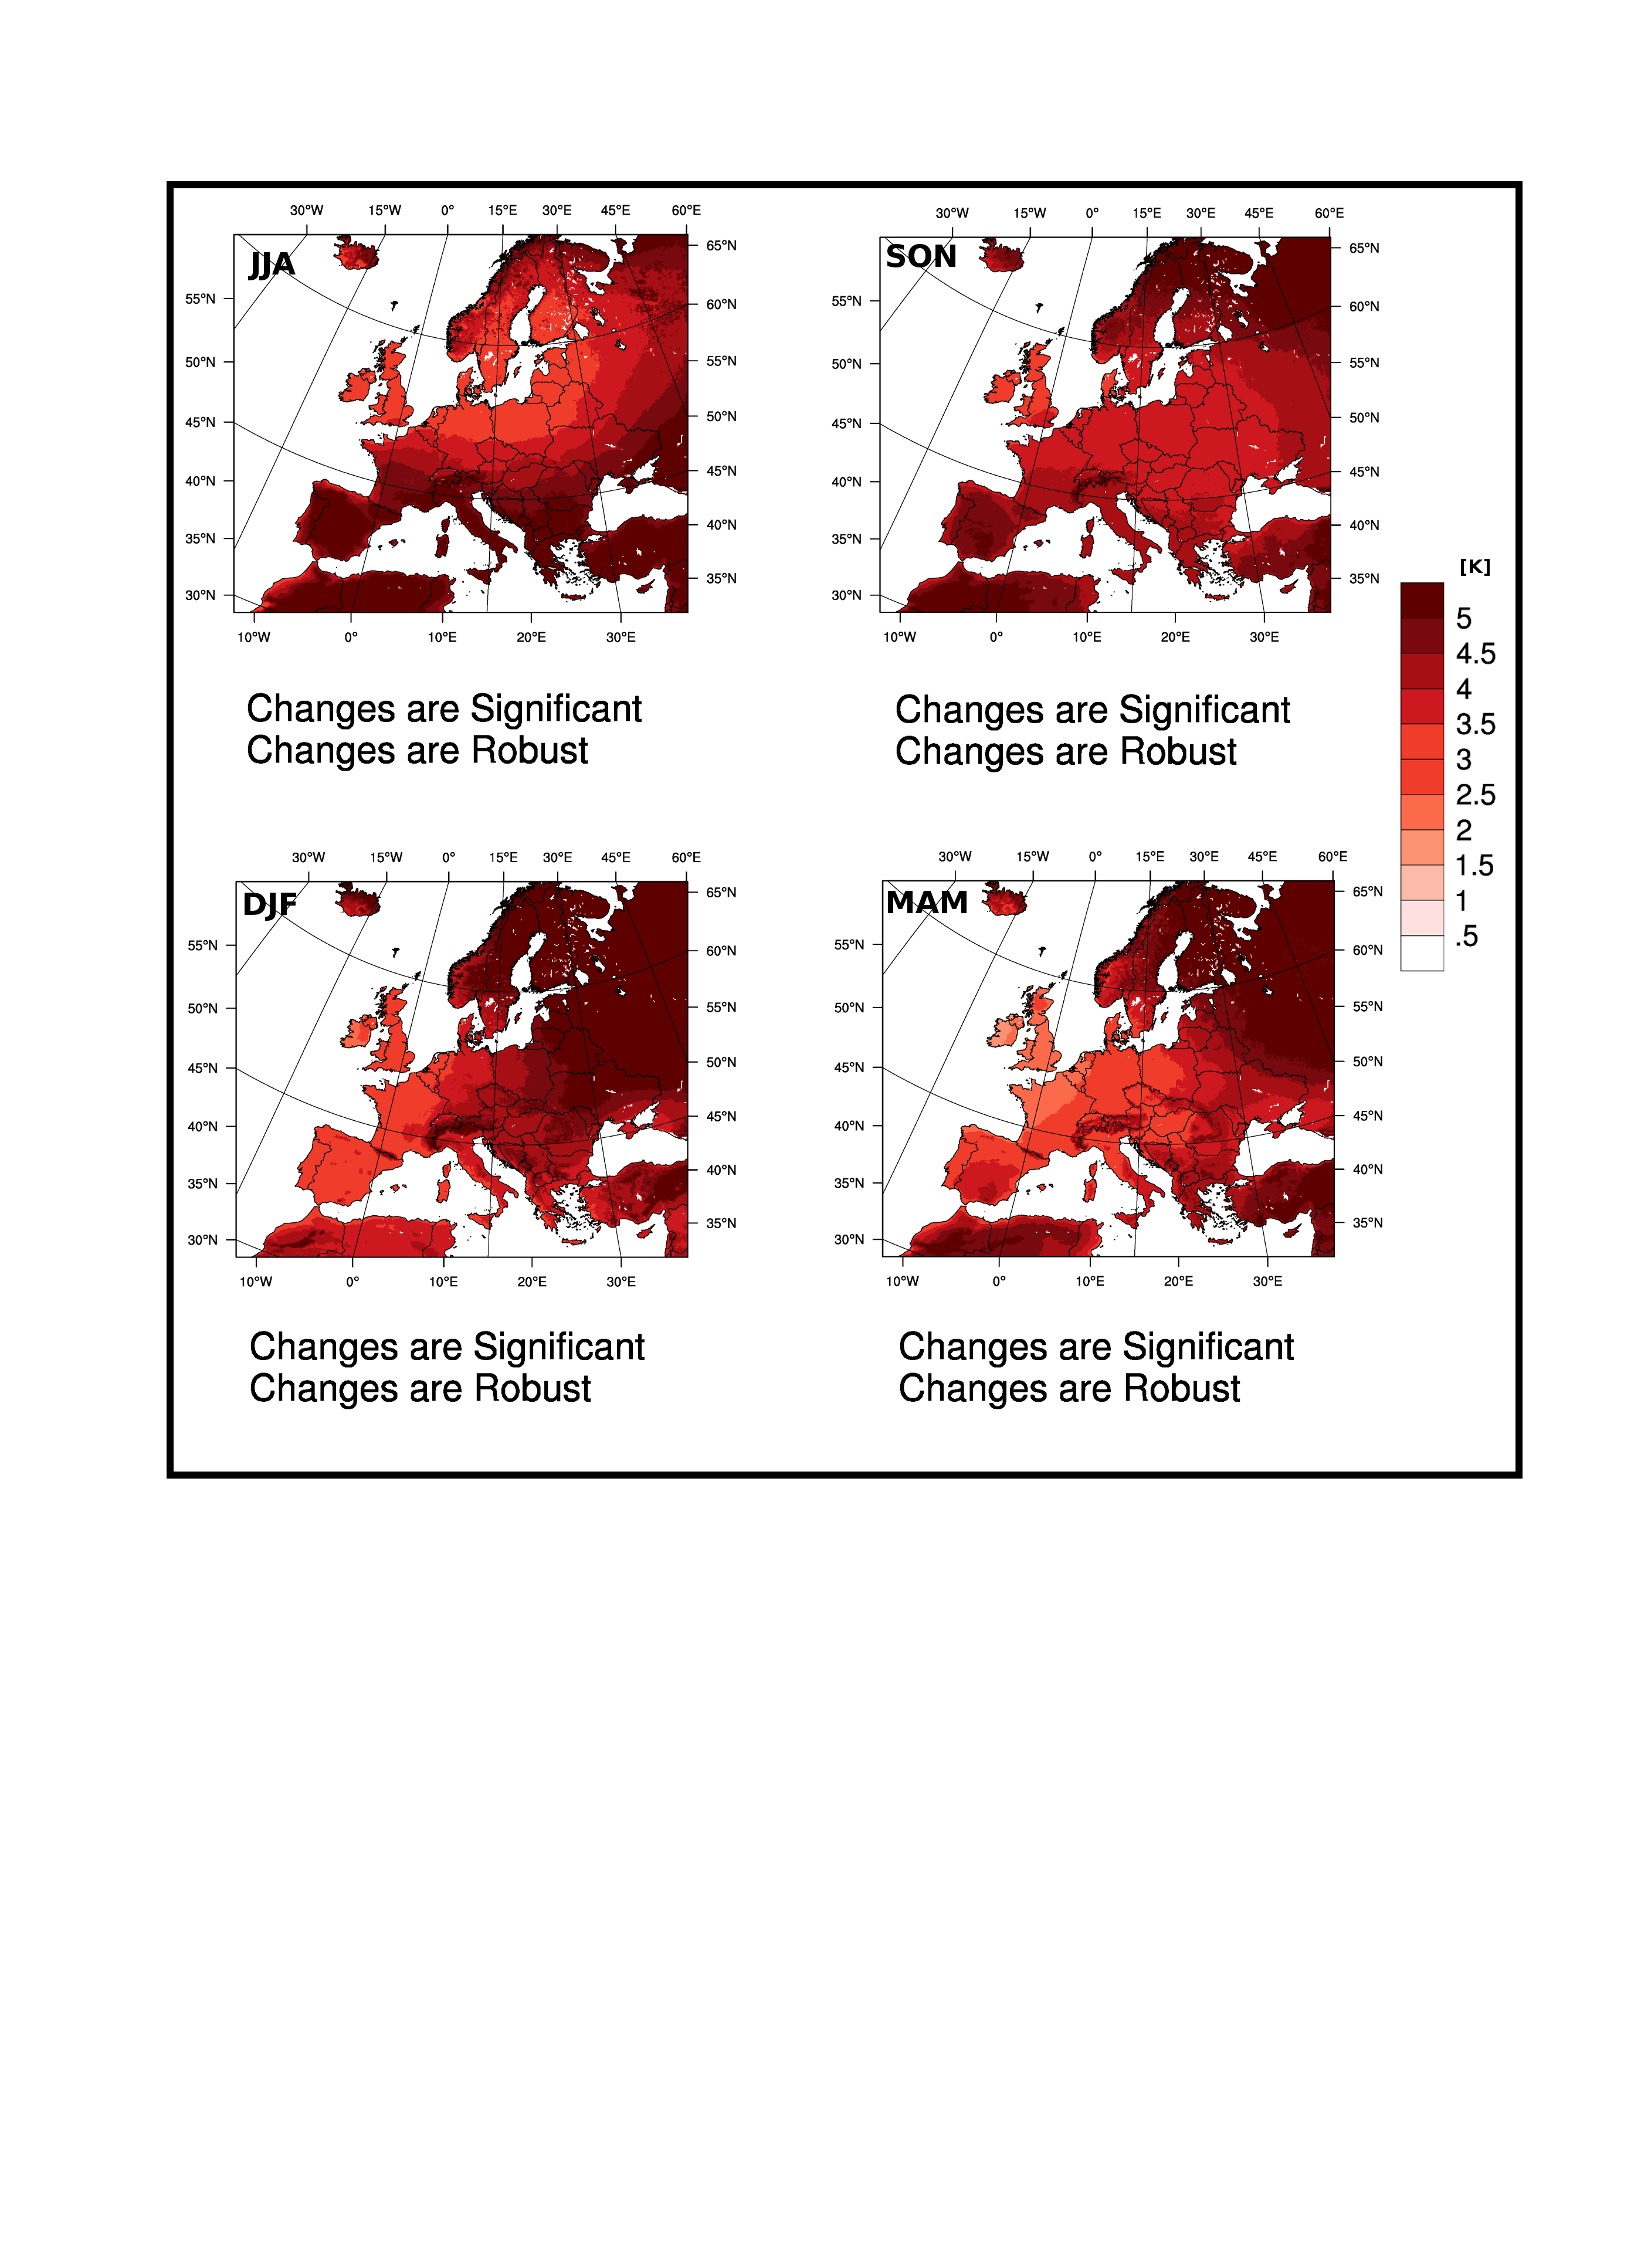


**Figure s3:** Projected seasonal changes of temperature [K] based on the RCP8.5 scenario for the period 2071-2100 compared to 1971-2000. Changes are robust and significant across the entire European continent.


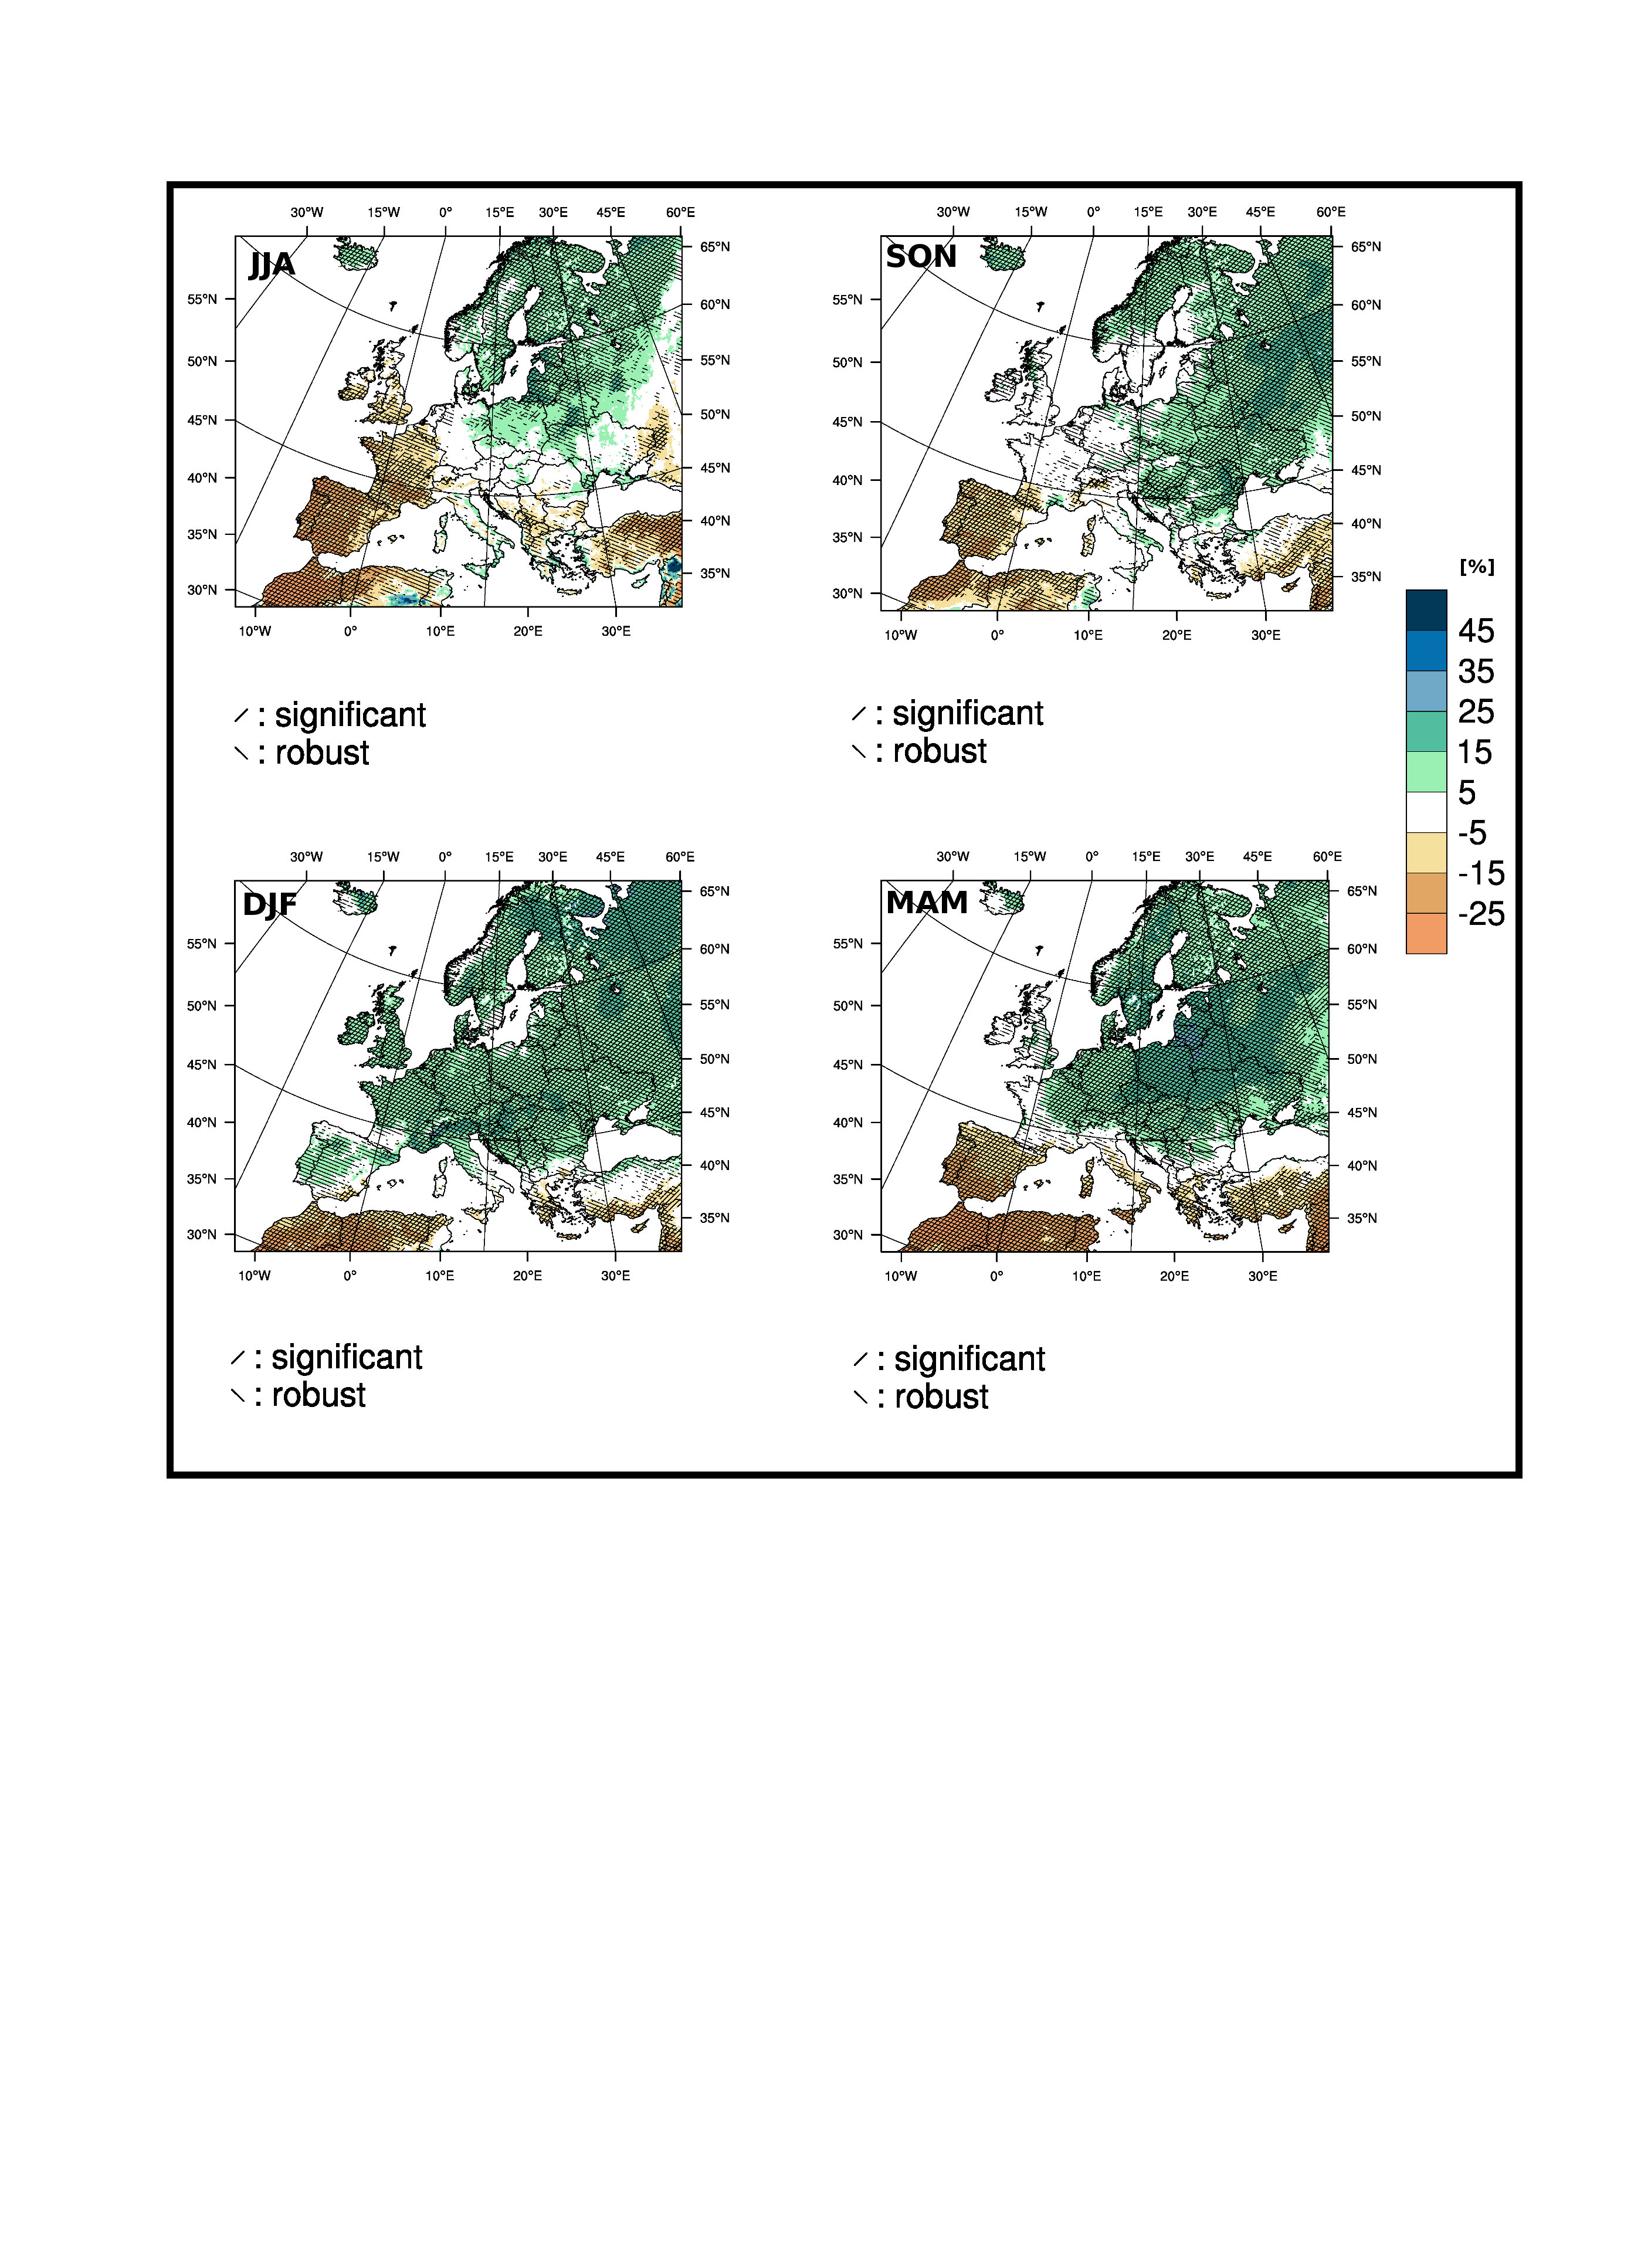


**Figure s4:** Projected seasonal changes of precipitation [%] based on the RCP4.5 scenario for the period 2071-2100 compared to 1971-2000. Hatched areas indicate regions with robust and/or statistical significant change.


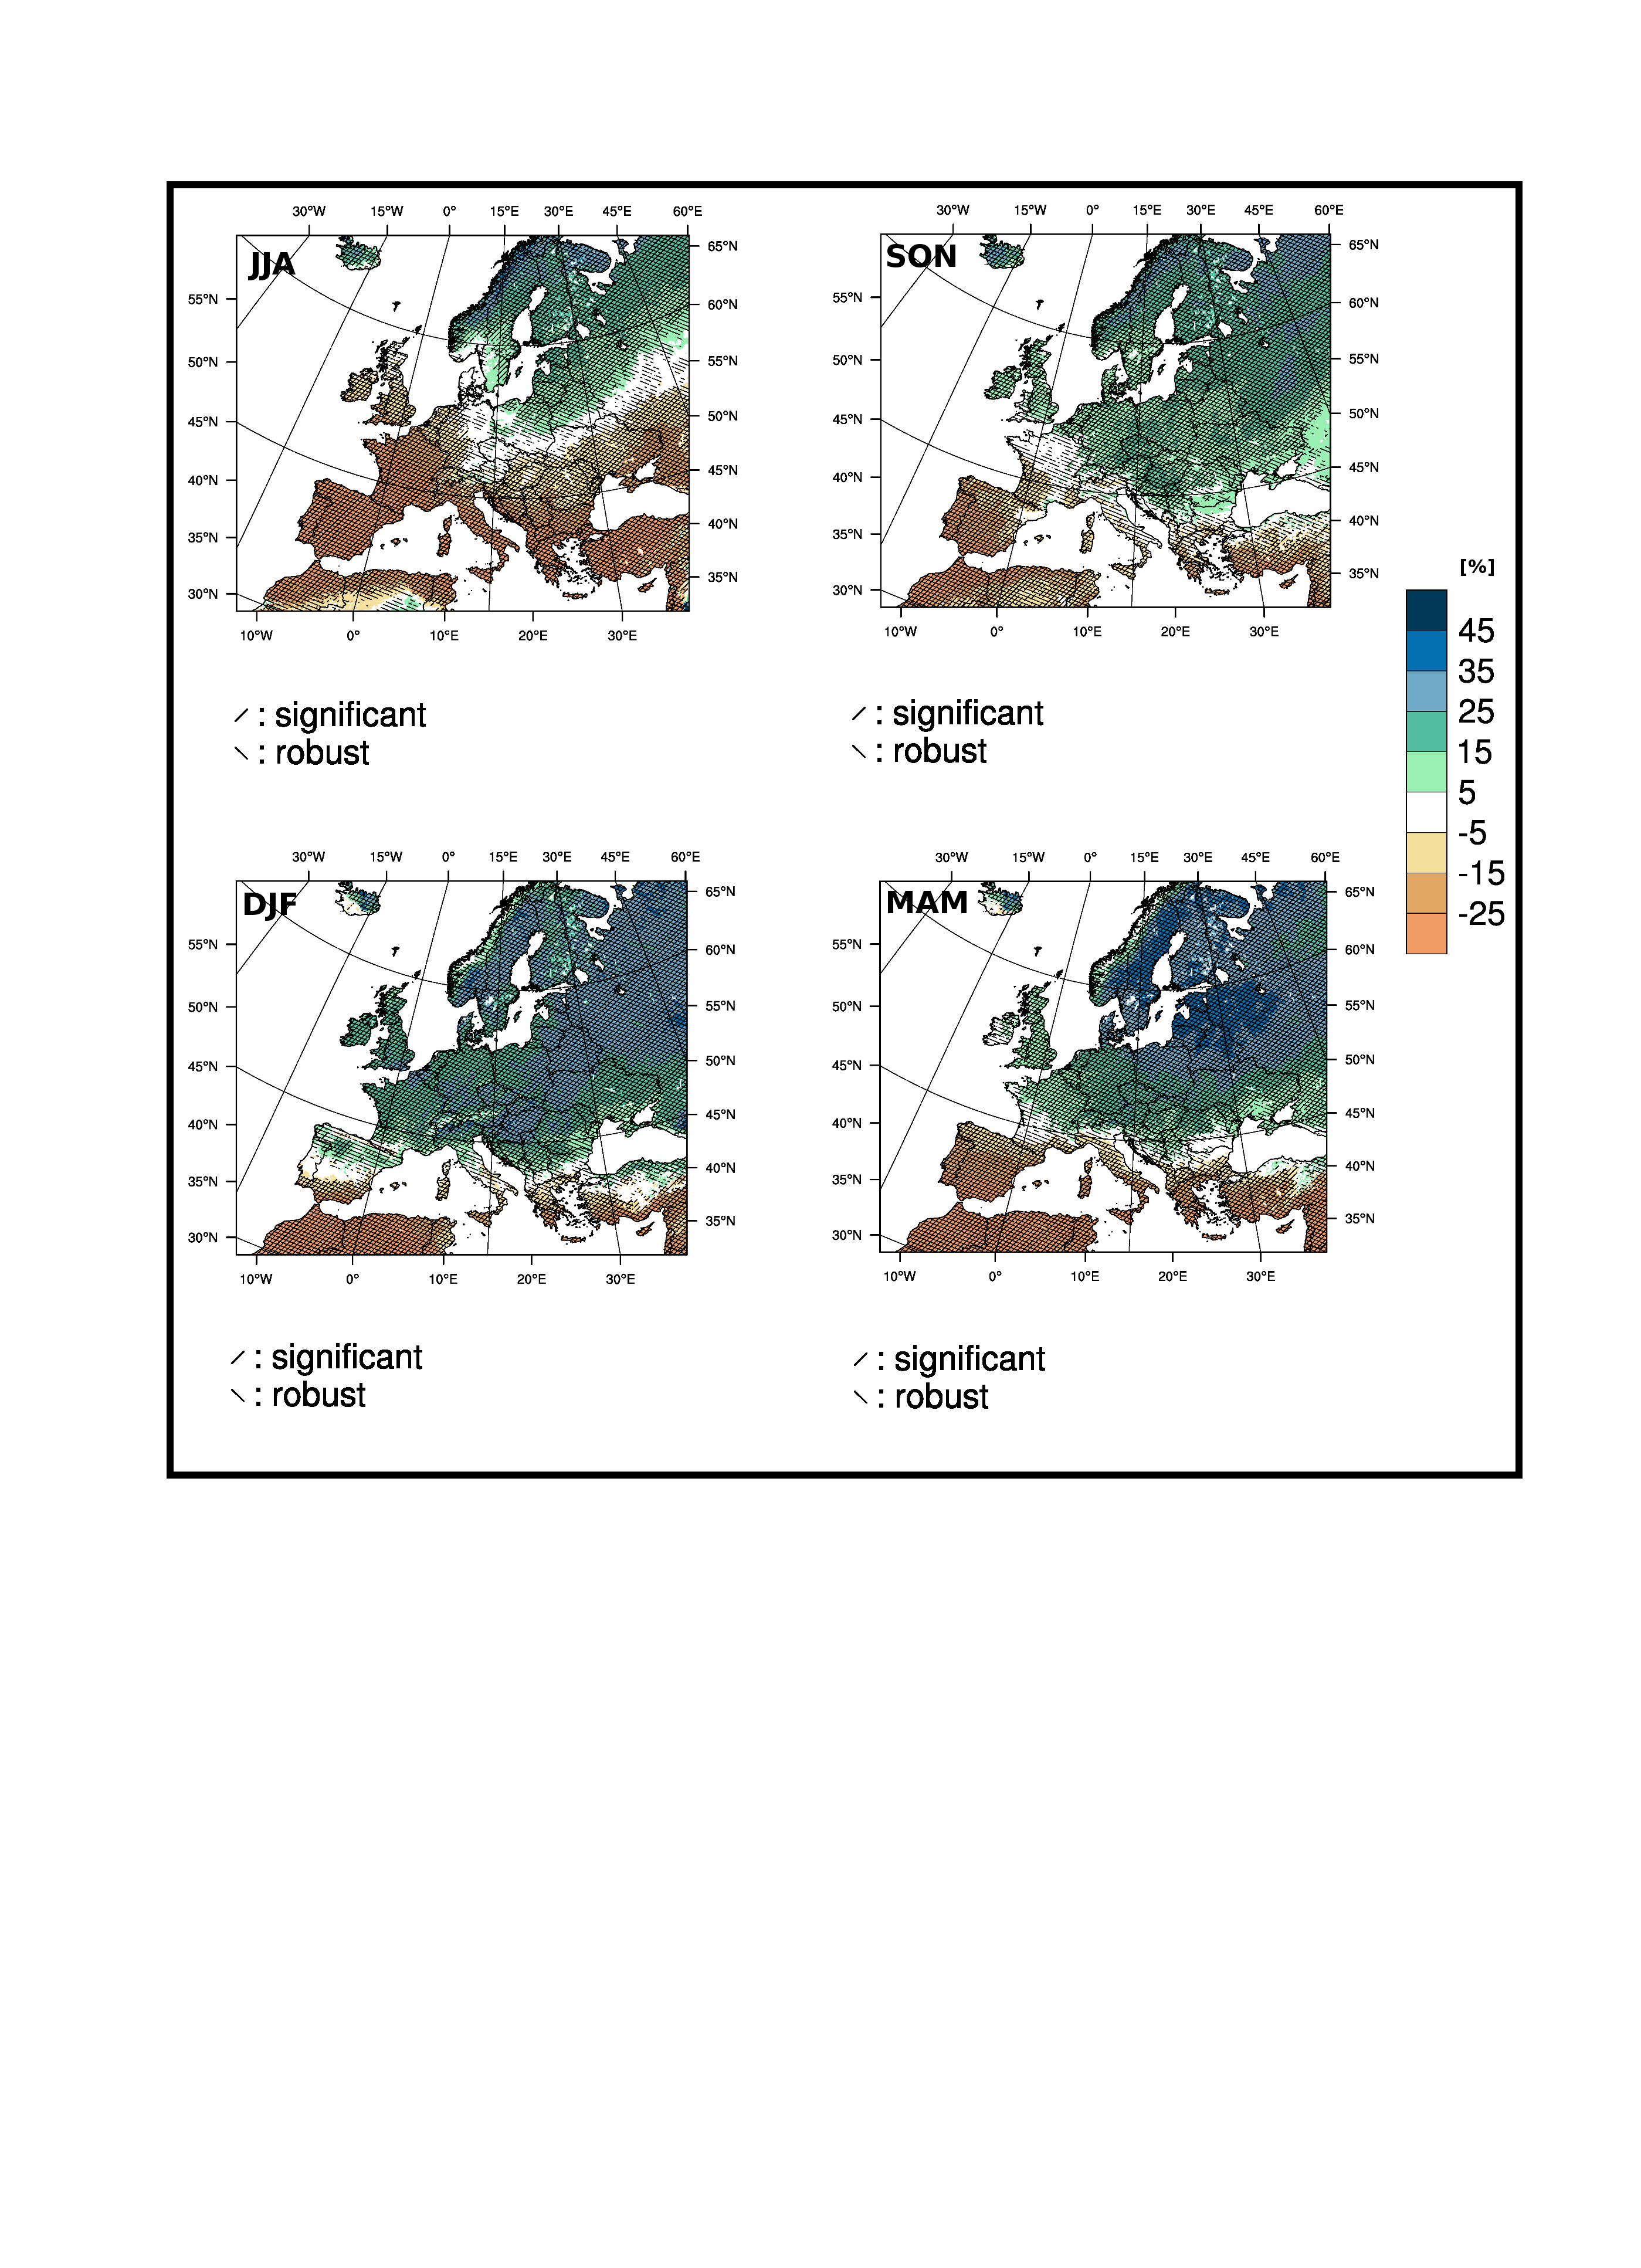


**Figure s5:** Projected seasonal changes of precipitation [%] based on the RCP8.5 scenario for the period 2071-2100 compared to 1971-2000. Hatched areas indicate regions with robust and/or statistical significant change.

Figures s2 to s5 show the seasonal climate change signals of mean temperature and precipitation for the end of the 21st century, in the ensemble mean for the scenarios RCP4.5 and RCP8.5. Temperature change signals are significant and robust in all seasons, but they show more regional heterogeneity than the yearly mean. The horizontal patterns look very similar for the two scenarios, with a smaller magnitude for RCP4.5. In winter and spring, there is a less pronounced warming in Western Europe compared to the yearly mean, with a strong increasing gradient towards the north east. In contrast, in summer, and to a less extent in autumn, there is a north-south gradient with the strongest warming in the Mediterranean and Black Sea region. However, a particularly strong warming in the Sub-Arctic region (over 5 °C for RCP8.5 and over 3.5 °C for RCP4.5) is seen throughout the year.

Same as for the yearly means, seasonal precipitation changes show a separating band between significant increases in the north and significant decreases in the south. However, this separation band shifts seasonally. In winter, only the most southern parts of Spain, Italy, Greece, and Turkey experience a decrease, while there is an increase for the rest of Europe. The separation band moves northward in spring, until in summer an increase is only seen in Scandinavia and North Eastern Europe, while there is a drying in Western, South-Eastern, and parts of Central Europe. In autumn, the band moves southward again. Same as for temperature, the precipitation change patterns are very similar for both scenarios, but for RCP8.5 they are larger in magnitude, and the separating band with insignificant changes is narrower.
